# Supplementary material for: Acute Endothelial Benefits of Fat Restriction over Carbohydrate Restriction in Type 2 Diabetes Mellitus: Beyond Carbs and Fats
Source: PubMed Central journal article supplement (PMC6316067; doi:10.3390/nu10121859), 2018-12-01
Supplement: nutrients-10-01859-s001.pdf [file nutrients-10-01859-s001.pdf]

## Supplementary

Supplement Table S1. Nutritional table of MODIFAST® drink vanilla flavor.

|                         | 100g<br>Powder | daily ratio<br>(220 g) | Portion<br>(55 g) | reference value |       | % RDA(220 g) |       |
|-------------------------|----------------|------------------------|-------------------|-----------------|-------|--------------|-------|
|                         |                |                        |                   | ♂               | ♀     | ♂            | ♀     |
| <b>Energy (kJ)</b>      | 1652 kJ        | 3634 kJ                | 909 kJ            |                 |       |              |       |
| <b>Energy (kcal)</b>    | 392            | 862                    | 216               | 2000            | 2500  | 43.1         | 34.5  |
| <b>Protein (g)</b>      | 24.8           | 54.6                   | 13.6              | 50              | 60    | 109.2        | 91    |
| <b>Carbohydrate (g)</b> | 50.6           | 111.3                  | 27.8              | 270             | 340   | 41.2         | 32.7  |
| (Sugar) (g)             | 13.8           | 30.4                   | 7.6               |                 |       |              |       |
| (Lactose) (g)           | 8.4            | 18.5                   | 4.6               |                 |       |              |       |
| <b>Fat (g)</b>          | 9              | 19.8                   | 4.9               | 70              | 80    | 28.3         | 24.8  |
| (SFA) (g)               | 3.6            | 7.9                    | 2                 | 20              | 30    | 39.5         | 26.3  |
| (MUFA) (g)              | 1.2            | 2.6                    | 0.66              |                 |       |              |       |
| (PUFA) (g)              | 2.1            | 4.6                    | 1.2               |                 |       |              |       |
| Linoleic acid (g)       | 2.1            | 4.6                    | 1.2               |                 |       |              |       |
| <b>Fiber (g)</b>        | 4.6            | 10.1                   | 2.5               | 30              | 30    | 33.7         | 33.7  |
| <b>Sodium (g)</b>       | 0.4            | 0.88                   | 0.22              | 0.55            | 0.55  | 160          | 160   |
| <b>Vitamins</b>         |                |                        |                   |                 |       |              |       |
| Vitamin A (µg)          | 382            | 840                    | 212               | 800             | 1000  | 105          | 84    |
| Vitamin D (µg)          | 3              | 6.6                    | 1.7               | 20              | 20    | 33           | 33    |
| Vitamin E (mg)          | 7              | 15                     | 3.9               | 12              | 14    | 125          | 107.1 |
| Vitamin B1 (mg)         | 1.2            | 2.6                    | 0.7               | 1               | 1.2   | 260          | 216.7 |
| Vitamin B2 (mg)         | 1.2            | 2.6                    | 0.7               | 1.2             | 1.4   | 216.7        | 185.7 |
| Vitamin B6 (mg)         | 0.9            | 2                      | 0.5               | 1.2             | 1.5   | 166.7        | 133.3 |
| Vitamin B12 (µg)        | 0.99           | 2.2                    | 0.55              | 3               | 3     | 73.3         | 73.3  |
| Vitamin C (mg)          | 27             | 59                     | 15                |                 |       |              |       |
| Biotin (µg)             | 14             | 31                     | 7.8               | 30-60           | 30-60 | 59           | 59    |
| Folic acid (µg)         | 140            | 308                    | 78                | 300             | 300   | 102.7        | 102.7 |
| Niacine (mg)            | 9.4            | 21                     | 5                 | 13              | 16    | 161.5        | 131.3 |
| Pantothenic acid (mg)   | 2.8            | 6.2                    | 1.5               | 6               | 6     | 103.3        | 103.3 |
| <b>Mineral Salts</b>    |                |                        |                   |                 |       |              |       |
| Calcium (mg)            | 455            | 1001                   | 252               | 1000            | 1000  | 100.1        | 100.1 |
| Magnesium (mg)          | 103            | 227                    | 57                | 325             | 325   | 69.8         | 69.8  |
| Phosphorus (mg)         | 391            | 860                    | 217               | 700             | 700   | 122.9        | 122.9 |
| Potassium (mg)          | 1410           | 3102                   | 783               | 2000            | 2000  | 155.1        | 155.1 |
| <b>Trace Elements</b>   |                |                        |                   |                 |       |              |       |
| Iron (mg)               | 7.8            | 17                     | 4.3               | 10              | 15    | 170          | 113.3 |
| Copper (mg)             | 0.67           | 1.5                    | 0.37              | 7               | 10    | 21.4         | 15    |
| Manganese (mg)          | 0.64           | 1.4                    | 0.35              | 3.5             | 3.5   | 40           | 40    |
| Zinc (mg)               | 6.6            | 15                     | 3.7               | 7               | 10    | 214.3        | 150   |
| Selenium (µg)           | 36             | 79                     | 20                | 50              | 50    | 158          | 158   |
| Iodine (µg)             | 125            | 275                    | 69                | 200             | 200   | 137.5        | 137.5 |

Nutritional table of MODIFAST® drink vanilla flavor. Values are presented as means. The daily intake (%) 220 g formula (4 bags of 55 g) is compared with the recommended nutritional intake [1]. SFA: Saturated fatty acids, MUFA: Monounsaturated fatty acids, PUFA: Polyunsaturated fatty acids.

1. Wolfram, G. New reference values for nutrient intake in Germany, Austria and Switzerland (DACH-Reference Values). *Forum. Nutr.* **2003**, *56*, 95–97.
